# Supplementary material for: Triple Negative Breast Cancer Preclinical Therapeutic Management by a Cationic Ruthenium-Based Nucleolipid Nanosystem
Source: MDPI journal article supplement (doi:10.3390/ijms24076473), 2023-03-30
Supplement: s1 [file s1]

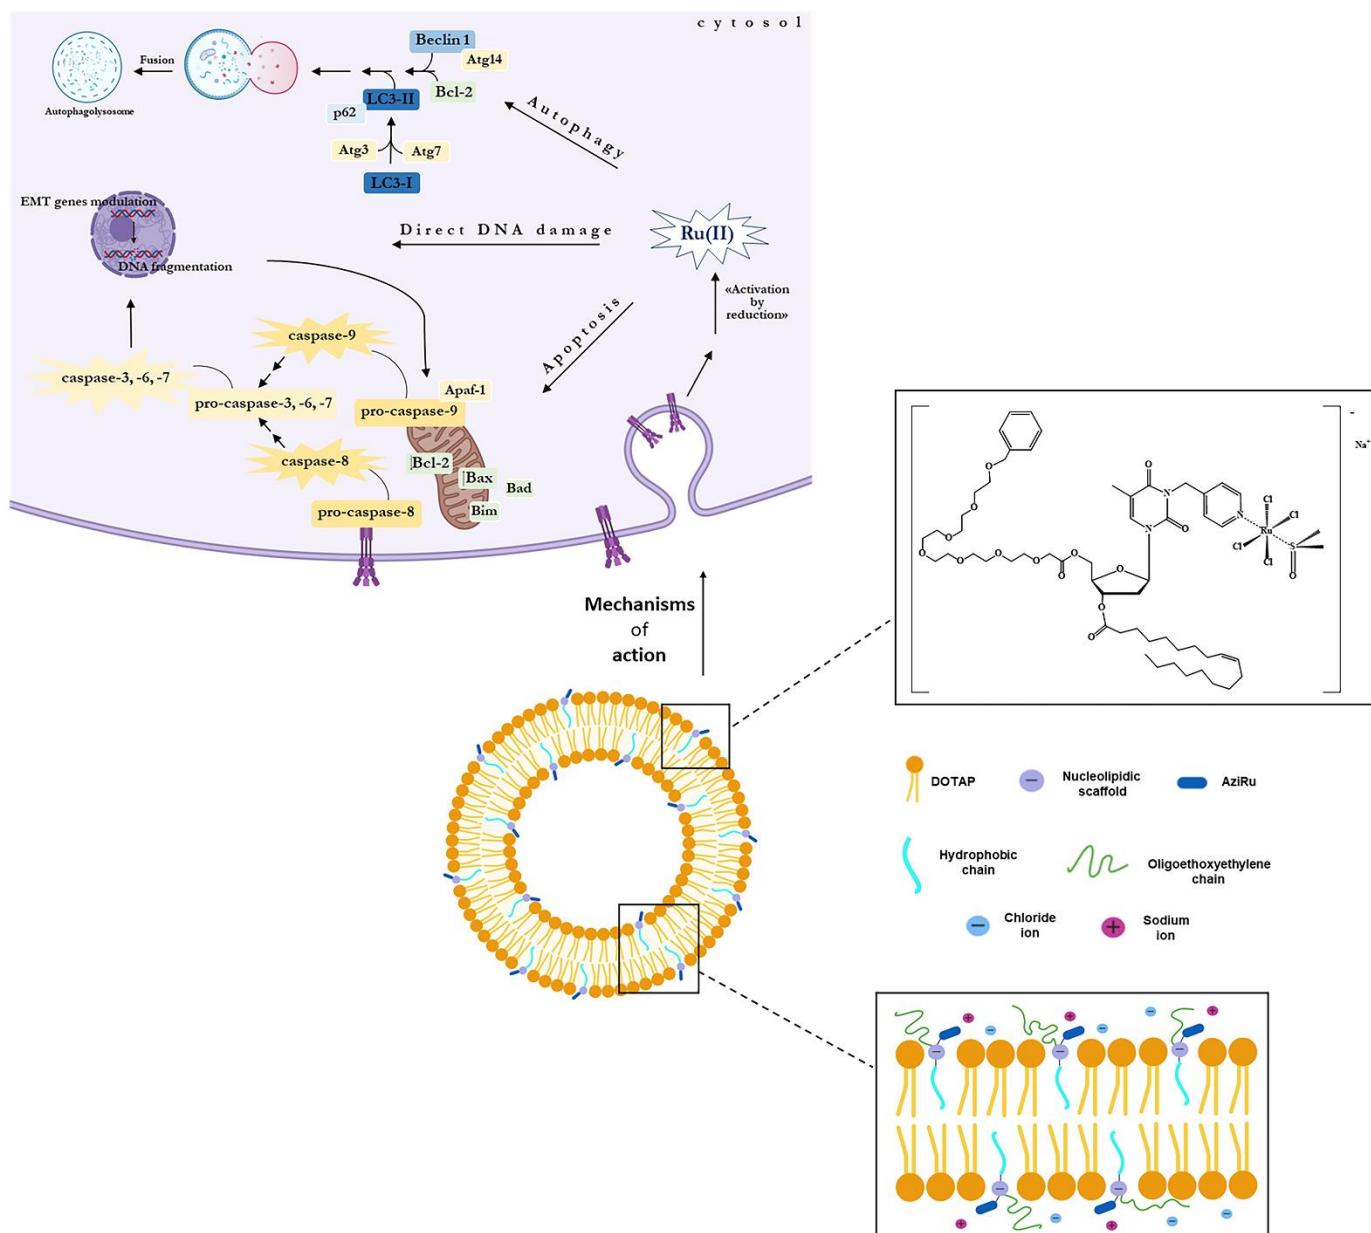

**Figure S1.** Schematic overview of the liposome HoThyRu/DOTAP molecular composition and its multimodal mechanisms of action in cancer cells.

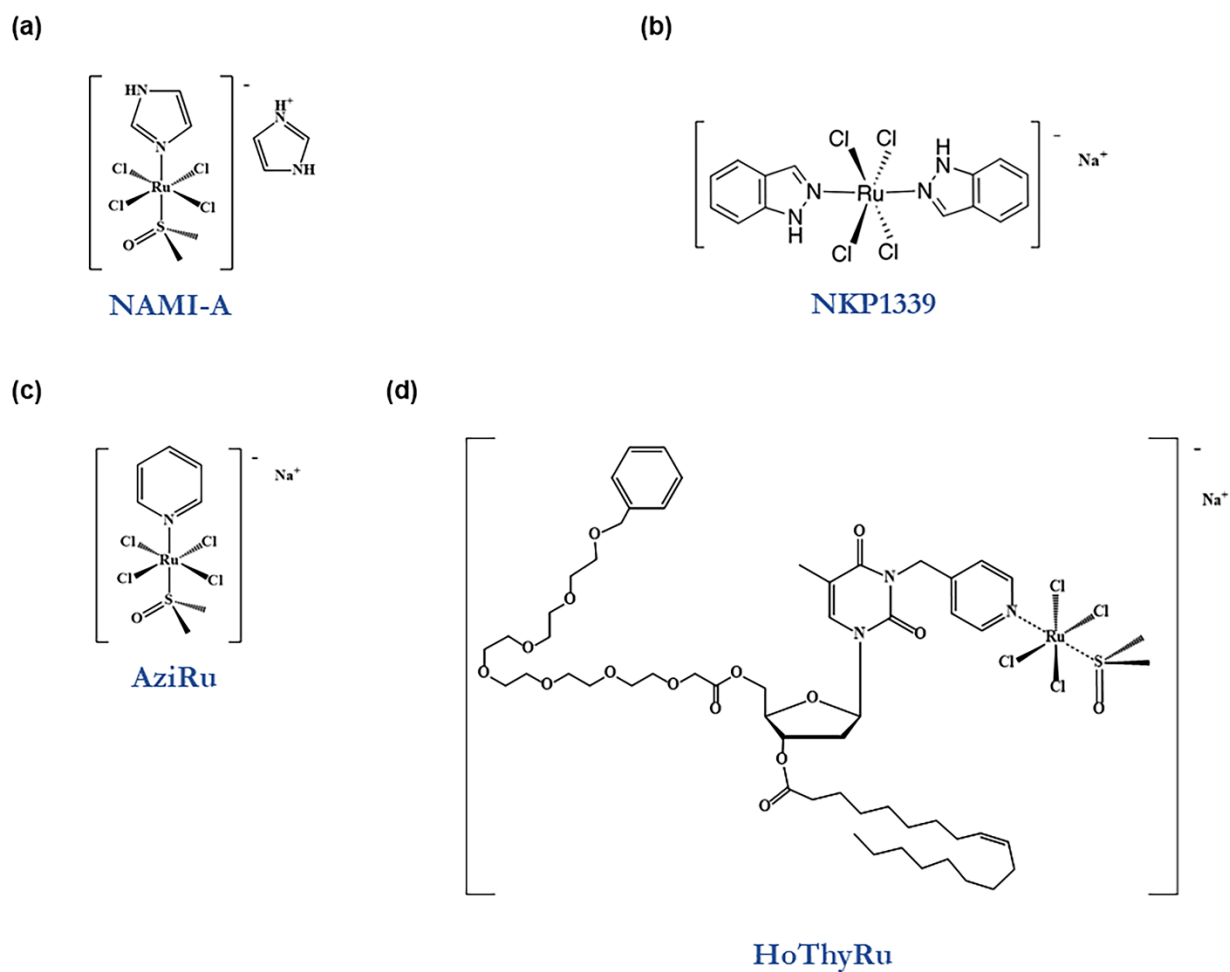

**Figure S2.** Molecular structures of the low molecular weight ruthenium complexes NAMI-A (a), NKP1339 (b), AziRu (c), and of the HoThyRu (d) nucleolipid-based complex incorporating AziRu.

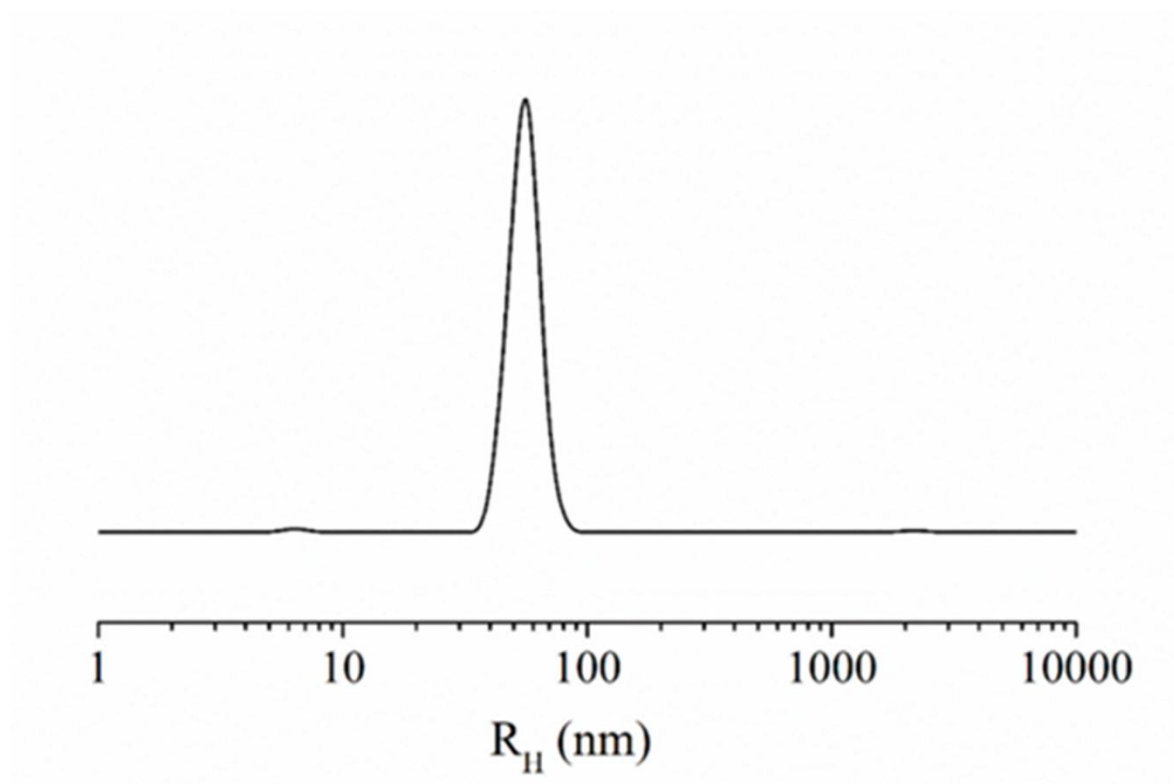

**Figure S3.** Hydrodynamic radius distribution function obtained through dynamic light scattering (DLS) measurements for the HoThyRu/DOTAP nanoformulations at 30:70 molar ratio.

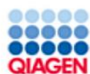

[www.qiagen.com](http://www.qiagen.com)

## Quantitation Report

### Experiment Information

|                         |                                |
|-------------------------|--------------------------------|
| Run Name                | 2023-02-17 RU                  |
| Run Start               | 2/17/2023 5:39:47 PM           |
| Run Finish              | 2/17/2023 6:37:23 PM           |
| Operator                |                                |
| Notes                   |                                |
| Run On Software Version | Rotor-Gene Q Software 2.3.1.49 |
| Run Signature           | The Run Signature is valid.    |
| Gain Green              | 5.33                           |
| Machine Serial No.      | 0914303                        |

### Quantitation Information

|                               |                            |
|-------------------------------|----------------------------|
| Threshold                     | 0.050                      |
| Left Threshold                | 1.000                      |
| Standard Curve Imported       | No                         |
| Standard Curve (1)            | N/A                        |
| Standard Curve (2)            | N/A                        |
| Start normalising from cycle  | 1                          |
| Noise Slope Correction        | No                         |
| No Template Control Threshold | % 0                        |
| Reaction Efficiency Threshold | Disabled                   |
| Normalisation Method          | Dynamic Tube Normalisation |
| Digital Filter                | Light                      |
| Sample Page                   | Page 1                     |
| Imported Analysis Settings    |                            |

### Profile

| Cycle                | Cycle Point                                                                                                |
|----------------------|------------------------------------------------------------------------------------------------------------|
| Hold                 | Hold @ 95°C, 0min 20s                                                                                      |
| Cycling (40 repeats) | Step 1: Hold @ 95°C, 1s<br>Step 2: Hold @ 60°C, 20s, acquiring to Cycling A[(Green)[1][1])                 |
| Melt                 | Ramp from 60°C to 95°C<br>Hold for 90s on the 1st step<br>Hold for 5s on next steps, Melt A[(Green)[1][1]) |

### Raw Data For Cycling A.Green

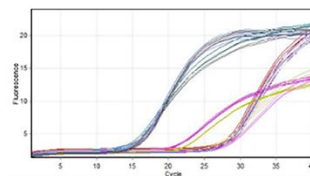

### Quantitation data for Cycling A.Green

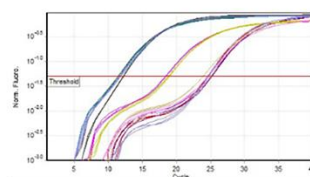

### Standard Curve

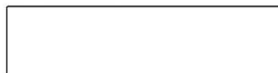

| No. | Color   | Name      | Type    | Ct    | Ct Comment | Given Conc (Copies) | Calc Conc (Copies) |
|-----|---------|-----------|---------|-------|------------|---------------------|--------------------|
| 1   | Red     | CTR-E-Cad | Unknown | 24.52 |            |                     |                    |
| 2   | Red     | CTR-E-Cad | Unknown | 24.69 |            |                     |                    |
| 3   | Red     | CTR-E-Cad | Unknown | 24.55 |            |                     |                    |
| 4   | Purple  | CTR-N-Cad | Unknown | 25.20 |            |                     |                    |
| 5   | Purple  | CTR-N-Cad | Unknown | 24.92 |            |                     |                    |
| 6   | Purple  | CTR-N-Cad | Unknown | 25.12 |            |                     |                    |
| 7   | Teal    | CTR-Vim   | Unknown | 11.43 |            |                     |                    |
| 8   | Teal    | CTR-Vim   | Unknown | 11.47 |            |                     |                    |
| 9   | Teal    | CTR-Vim   | Unknown | 11.59 |            |                     |                    |
| 10  | Magenta | CTR-Slug  | Unknown | 18.39 |            |                     |                    |
| 11  | Magenta | CTR-Slug  | Unknown | 18.47 |            |                     |                    |
| 12  | Magenta | CTR-Slug  | Unknown | 18.46 |            |                     |                    |
| 13  | Yellow  | CTR-Snail | Unknown | 23.84 |            |                     |                    |

| No. | Color | Name      | Type    | Ct    | Ct Comment | Given Conc (Copies) | Calc Conc (Copies) |
|-----|-------|-----------|---------|-------|------------|---------------------|--------------------|
| 14  |       | CTR-Snail | Unknown | 23.84 |            |                     |                    |
| 15  |       | CTR-Snail | Unknown | 23.87 |            |                     |                    |
| 16  |       | CTR-GAPDH | Unknown | 11.87 |            |                     |                    |
| 17  |       | CTR-GAPDH | Unknown | 11.87 |            |                     |                    |
| 18  |       | CTR-GAPDH | Unknown | 11.86 |            |                     |                    |
| 28  |       | Ru-N-Cad  | Unknown | 24.97 |            |                     |                    |
| 29  |       | Ru-N-Cad  | Unknown | 24.83 |            |                     |                    |
| 30  |       | Ru-N-Cad  | Unknown | 24.89 |            |                     |                    |
| 31  |       | Ru-Vim    | Unknown | 11.39 |            |                     |                    |
| 32  |       | Ru-Vim    | Unknown | 11.40 |            |                     |                    |
| 33  |       | Ru-Vim    | Unknown | 11.46 |            |                     |                    |
| 34  |       | Ru-Slug   | Unknown | 18.96 |            |                     |                    |
| 35  |       | Ru-Slug   | Unknown | 18.82 |            |                     |                    |
| 36  |       | Ru-Slug   | Unknown | 18.76 |            |                     |                    |
| 37  |       | Ru-Snail  | Unknown | 24.59 |            |                     |                    |
| 38  |       | Ru-Snail  | Unknown | 24.55 |            |                     |                    |
| 39  |       | Ru-Snail  | Unknown | 24.58 |            |                     |                    |
| 40  |       | Ru-GAPDH  | Unknown | 11.74 |            |                     |                    |
| 41  |       | Ru-GAPDH  | Unknown | 11.79 |            |                     |                    |
| 42  |       | Ru-GAPDH  | Unknown | 11.79 |            |                     |                    |
| 49  |       | Ru-E-Cad* | Unknown | 24.58 |            |                     |                    |
| 50  |       | Ru-E-Cad* | Unknown | 24.60 |            |                     |                    |
| 51  |       | Ru-E-Cad* | Unknown | 24.65 |            |                     |                    |
| 64  |       | Ru-GAPDH° | Unknown | 12.17 |            |                     |                    |
| 65  |       | Ru-GAPDH° | Unknown | 12.28 |            |                     |                    |
| 66  |       | Ru-GAPDH° | Unknown | 12.24 |            |                     |                    |

**Legend:**

NEG (NTC) - Sample cancelled due to NTC Threshold.

NEG (R. Eff) - Sample cancelled as efficiency less than reaction efficiency threshold.

This report was generated by Rotor-Gene Q Series Software 2.3.1 (Build 49)  
Copyright ©2013 QIAGEN GmbH. All Rights Reserved.

**Figure S4.** Report RT-qPCR.
